# Supplementary material for: Experimental priming of encephalitogenic Th1/Th17 cells requires pertussis toxin-driven IL-1β production by myeloid cells
Source: PubMed Central journal article supplement (PMC4873938; doi:10.1038/ncomms11541), 2016-05-18
Supplement: ncomms11541-s1.pdf [file ncomms11541-s1.pdf]

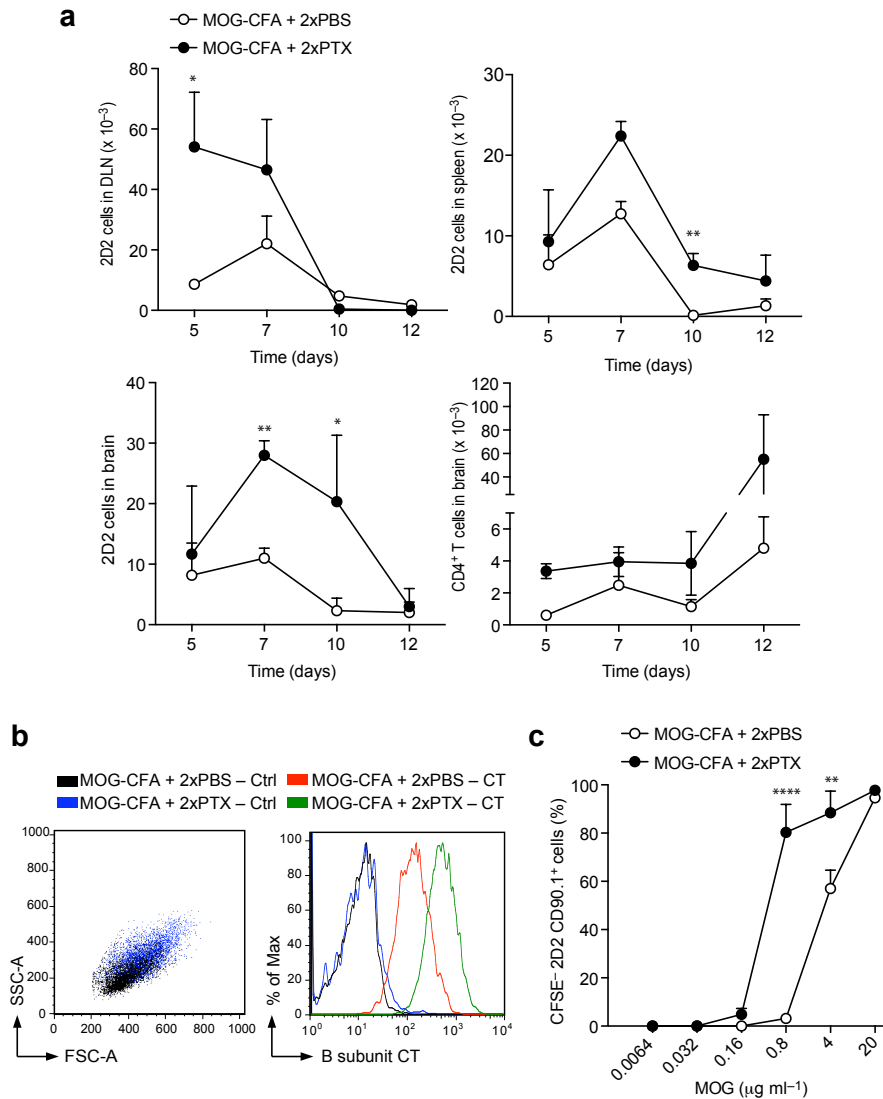

**Supplementary Figure 1: PTX synergizes with CFA to promote expansion of highly responsive 2D2 T cells.**

(a) Absolute number of CD90.1<sup>+</sup> CD4<sup>+</sup> TCR-transgenic 2D2 T cells in DLN, spleen and brain and of endogenous CD90.1<sup>-</sup> CD4<sup>+</sup> T cells in brain of wt mice, which had been adoptively transferred with naïve 2D2 T cells, at different time points after immunization with MOG-CFA and injection of PBS or PTX on day 0 and day 2. Data are mean + s.e.m. (n=3) and are representative of more than five independent experiments with at least three mice per group. (b) Forward and side scatter (left) and staining with FITC-labelled cholera toxin (CT) B subunit (right) of 2D2 T cells from DLN of wt mice on day 5 after immunization. Data are representative of three independent experiments with at least three mice per group. (c) Percentage of CFSE<sup>-</sup> 2D2 T cells proliferating *in vitro* to MOG<sub>35-55</sub>. CD90.1<sup>+</sup> CD4<sup>+</sup> 2D2 T cells were isolated from DLN of immunized mice and stimulated *in*

*vitro* with bone marrow-derived LPS-matured DCs pulsed with the indicated doses of MOG<sub>35-55</sub>. Proliferation, as measured by CFSE dilution, was assessed after 72 hrs of culture. Data are mean + s.e.m. (n=3) and are representative of three independent experiments with at least three mice per group. \*,  $P < 0.05$ ; \*\*,  $P < 0.01$ ; \*\*\*\*,  $P < 0.0001$ , as determined by nonparametric unpaired Mann-Whitney test. When not indicated, differences were not statistically significant.

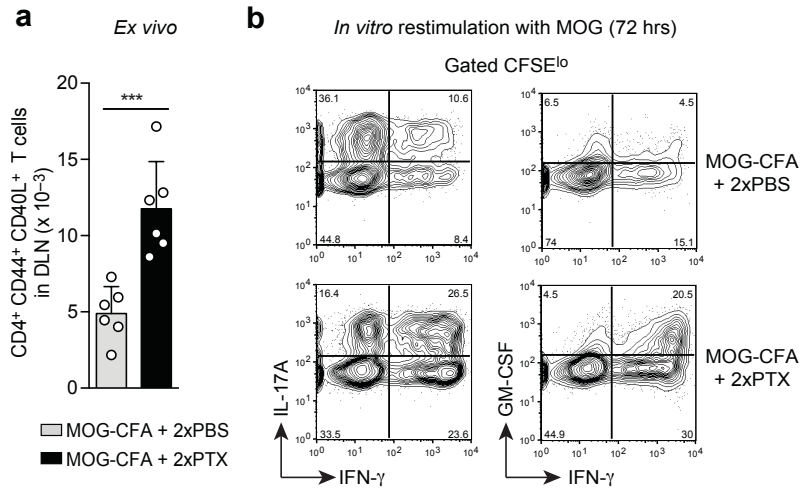

**Supplementary Figure 2: PTX induces encephalitogenic Th1/17 cells.**

(a) Absolute number of CD4<sup>+</sup> CD44<sup>+</sup> CD40L<sup>+</sup> endogenous T cells measured on day 5 in DLN of wt mice (with no adoptive transfer of 2D2 T cells) after immunization with MOG-CFA and injection of PBS or PTX on day 0 and day 2. Each symbol represents an individual mouse (n=6). Data are representative of more than three independent experiments, with at least three mice per group. (b) Representative flow cytometry analysis of intracellular cytokine staining of proliferating MOG-reactive CFSE<sup>-</sup> CD4<sup>+</sup> T cells. CD4<sup>+</sup> CD44<sup>+</sup> T cells were isolated from DLN of immunized mice, labelled with CFSE and stimulated *in vitro* for 72 hrs with MOG<sub>35-55</sub>-pulsed splenocytes. T cells were then restimulated for 5 hrs with PMA and ionomycin in the presence of BFA for the last 3 hrs before intracellular staining. Data are representative of more than three independent experiments with at least three mice per group. Numbers represent percentage of cells in each quadrant.  $P < 0.001$ , \*\*\* as determined by nonparametric unpaired Mann-Whitney test.

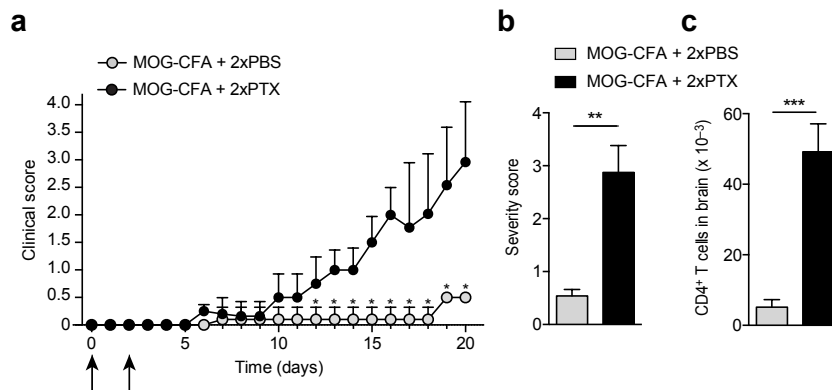

**Supplementary Figure 3: PTX increases the incidence and severity of EAE.**

**(a)** Clinical scores of C57BL/6 mice at various times after immunization with MOG-CFA and injection of PBS or PTX on day 0 and day 2 (arrows). Data are mean + s.e.m. (n=5) and are representative of more than 5 independent experiments with 4-5 mice per group.

**(b)** Severity score of mice shown in a (day 20). Data are mean + s.e.m. (n=7) and are representative of more than 5 independent experiments with 4-5 mice per group. **(c)**

Absolute number of endogenous CD4<sup>+</sup> T cells in brain and spinal cord of wt mice on day 5 after immunization. Data are mean + s.e.m. (n=5) and are representative of more than three independent experiments with 5-7 mice per group. \*,  $P < 0.05$ , \*\*,  $P < 0.01$ , \*\*\*,  $P < 0.001$ , as determined by nonparametric unpaired Mann-Whitney test.

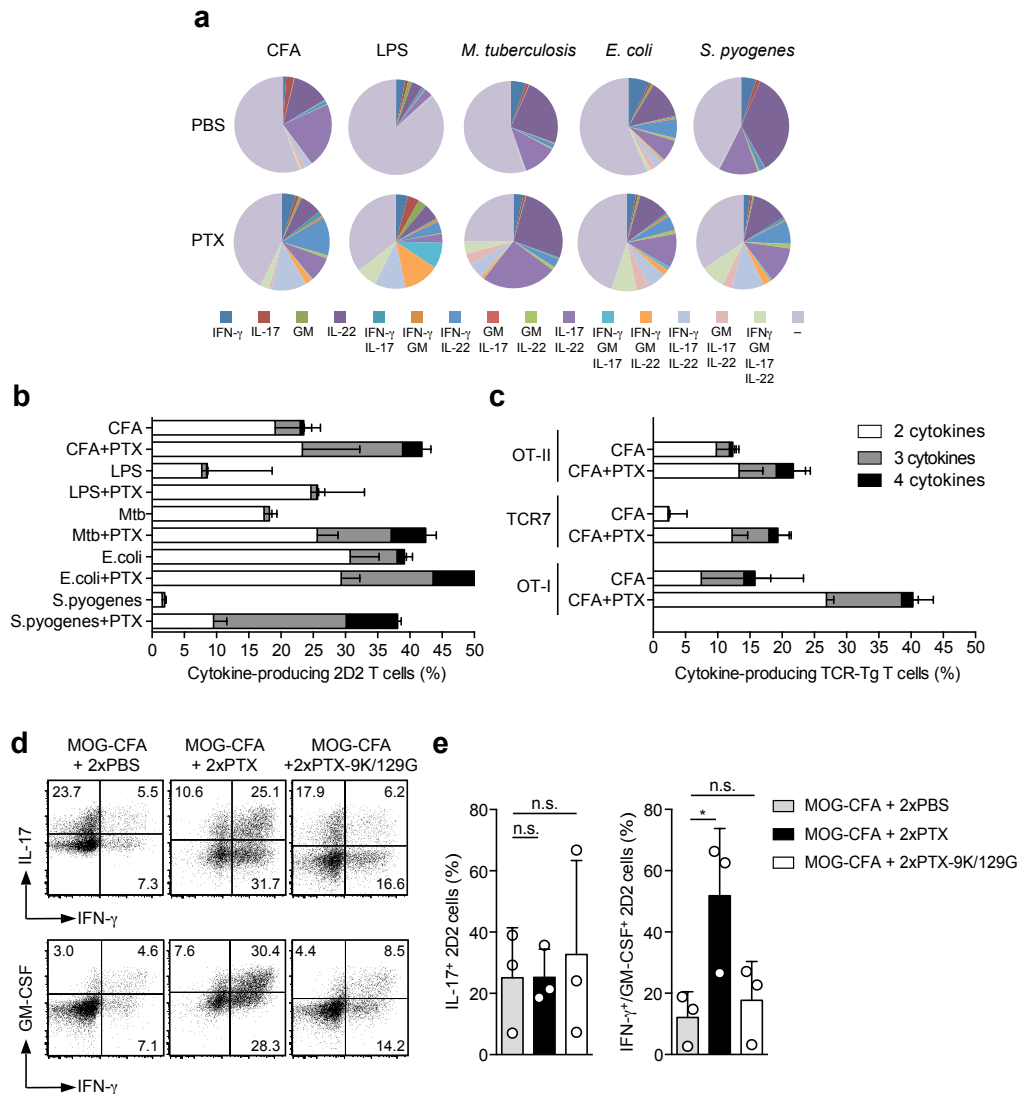

**Supplementary Figure 4: Enzymatically active PTX synergizes with several TLR agonists for priming of multifunctional T cells.**

**(a)** Boolean gating analysis showing each possible combination of production of IFN- $\gamma$ , IL-17A, IL-22 and GM-CSF by 2D2 T cells in DLN of mice immunized with MOG together with either CFA, LPS, *M. tuberculosis*, *E. coli*, or *S. pyogenes* and injected with PBS or PTX on day 0 and day 2. **(b)** Histogram of the data shown in a. Percentage of 2D2 T cells producing 2, 3 or 4 cytokines (IFN- $\gamma$ , IL-17A, IL-22 and GM-CSF) in different combinations in DLN of immunized mice. Data are mean+ s.e.m. (n=3) are representative of 3 independent experiments with 3 mice per group. **(c)** Percentage of OT-II, TCR7, or OT-I transgenic T cells producing 2, 3 or 4 cytokines (IFN- $\gamma$ , IL-17A, IL-22 and GM-CSF) in different combinations in DLN of mice immunized with the relevant antigen in CFA.

Data are mean+ s.e.m. (n=3) are representative of 2 independent experiments with 3 mice per group. **(d)** Representative flow cytometry analysis of cytokine staining of 2D2 T cells producing IL-17, GM-CSF and IFN- $\gamma$  in DLN on day 5 after immunization with MOG-CFA and injection of PBS, PTX, or enzymatically inactive PTX-9K/129G on day 0 and 2. For intracellular cytokine staining, cells were stimulated *ex vivo* for 5 hrs with PMA and ionomycin, in the presence of BFA for the last 3 hrs. **(e)** Percentage of 2D2 T cells producing IL-17, GM-CSF and/or IFN- $\gamma$  in DLN on day 5 after immunization. Data are mean + s.e.m. (n=3) and are representative of three independent experiments with at least three mice per group. Each symbol represents an individual mouse. \*,  $P < 0.05$ , as determined by nonparametric unpaired Mann-Whitney test.

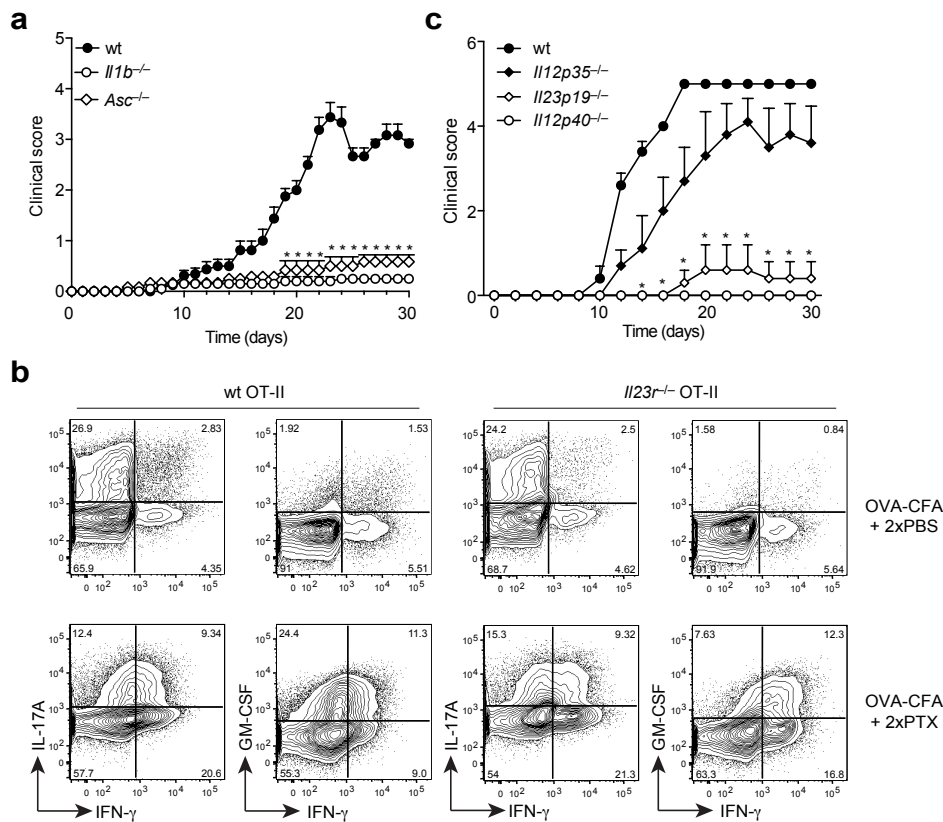

**Supplementary Figure 5: ASC-, IL-1 $\beta$ - and IL-23-deficient mice are resistant to EAE.**

(a) Clinical scores of wt, *Asc*<sup>-/-</sup> and *Il1b*<sup>-/-</sup> mice at various times after immunization with MOG-CFA and injection of PTX on day 0 and day 2. Data are mean + s.e.m. (n=5-7) and are representative of more than three independent experiments with at least five mice per group. (b) Representative flow cytometry analysis of cytokine staining of wt or *Il23r*<sup>-/-</sup> OT-II cells producing IL-17, GM-CSF and IFN- $\gamma$  in DLN on day 5 after immunization with OVA-CFA and injection of PBS or PTX on day 0 and day 2. For intracellular cytokine staining, cells were stimulated *ex vivo* for 5 hrs with PMA and ionomycin, in the presence of BFA for the last 3 hrs. Data are from pool of six lymph nodes/group from three immunized mice and are representative of two independent experiments. (c) Clinical scores of wt, *Il12p35*<sup>-/-</sup>, *Il12p40*<sup>-/-</sup>, and *Il23p19*<sup>-/-</sup> mice at various times after immunization with MOG-CFA and injection of PTX on day 0 and 2. Data are mean + s.e.m. (n=5) and are representative of more than three independent experiments with at least five mice per group. \*,  $P < 0.05$ , as determined by nonparametric unpaired Mann-Whitney test.

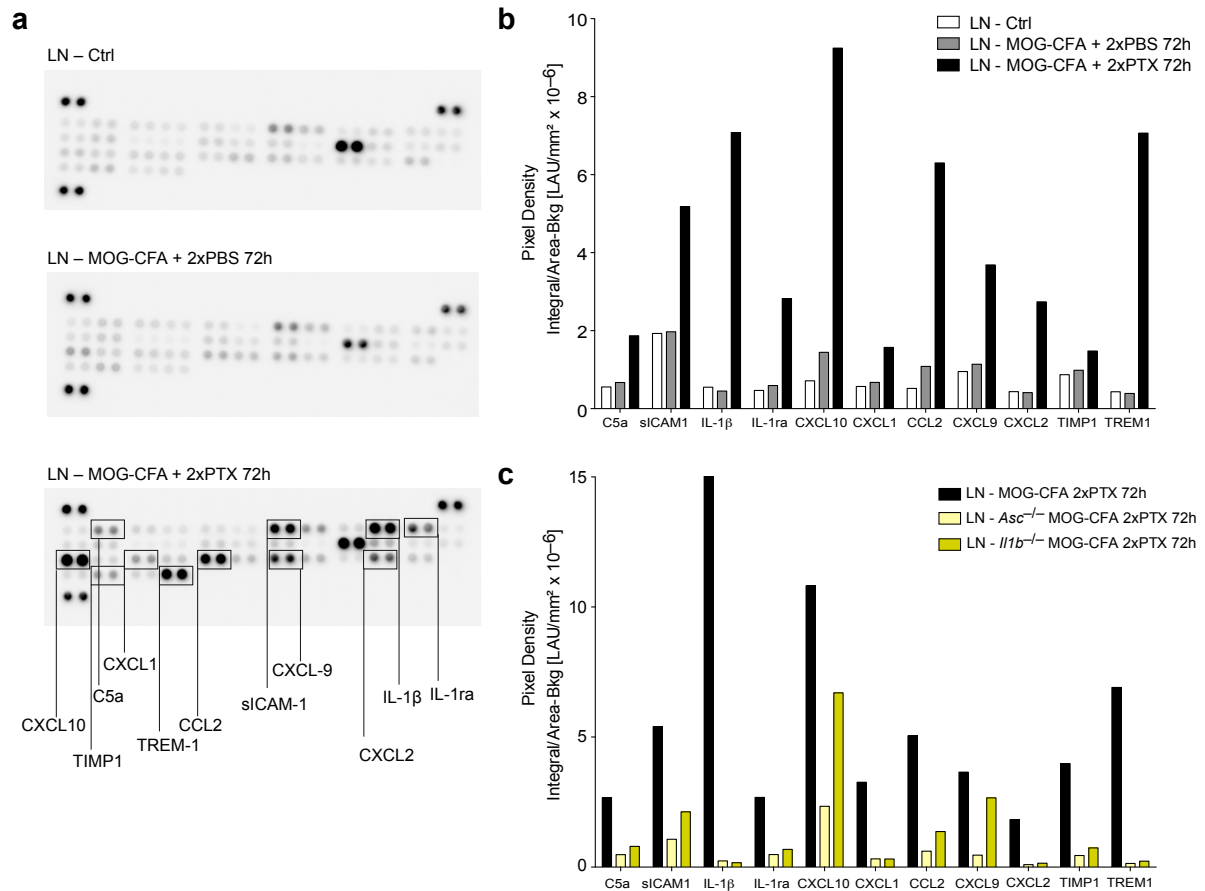

**Supplementary Figure 6: (a)** Proteome profiler assay on lymph node lysates (LN) from wt mice not immunized (Ctrl) or 72 hrs after immunization with CFA and injection of PBS or PTX on day 0 and day 2. Organs were lysed and proteins were extracted and loaded onto nitrocellulose membranes. Protein samples were from a pool of six lymph nodes/group from three immunized mice. Data are representative of three independent experiments. **(b)** Quantification of the cytokine array data shown in a. **(c)** Quantification of the cytokine array data performed on lymph node lysates (LN) from wt, *Asc*<sup>-/-</sup> and *Il1b*<sup>-/-</sup> mice 72 hrs after immunization with CFA and injection of PTX on day 0 and day 2. Data are from pool of six lymph nodes/group from three immunized mice. A modest increase of IL-1 $\beta$ , CXCL1 and CXCL2 was detected in the blood 6 hrs after the second injection of PTX.



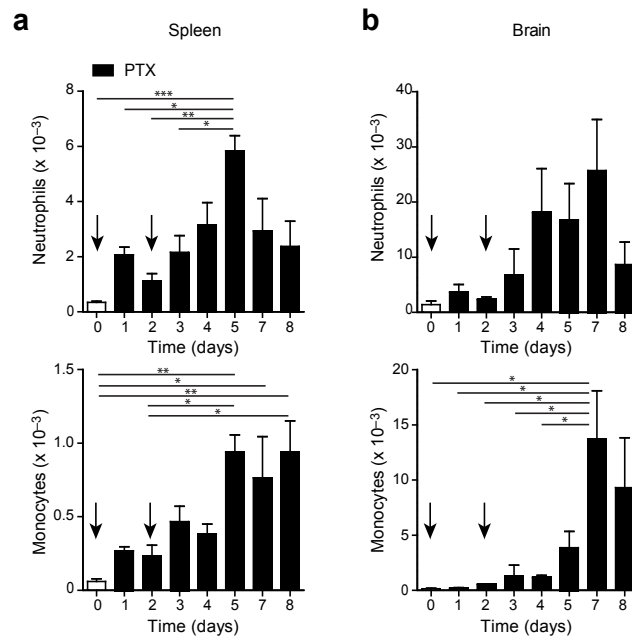

**Supplementary Figure 7: Injection of PTX alone induces inflammatory monocyte and neutrophil recruitment in the spleen and brain of wt mice.**

(a, b) Absolute number of  $CD11b^{+} Gr1^{hi} Ly6C^{int} Ly6G^{+}$  neutrophils or  $CD11b^{+} Gr1^{int} Ly6C^{hi} Ly6G^{-}$  monocytes in spleen and brain at different time points following injection of PTX alone on day 0 and on day 2 (as indicated by the arrows). Data are mean + s.e.m. and are representative of more than three independent experiments with at least three mice per group. \*,  $P < 0.05$ ; \*\*,  $P < 0.01$ ; \*\*\*,  $P < 0.001$ , as determined by nonparametric unpaired Mann-Whitney test.

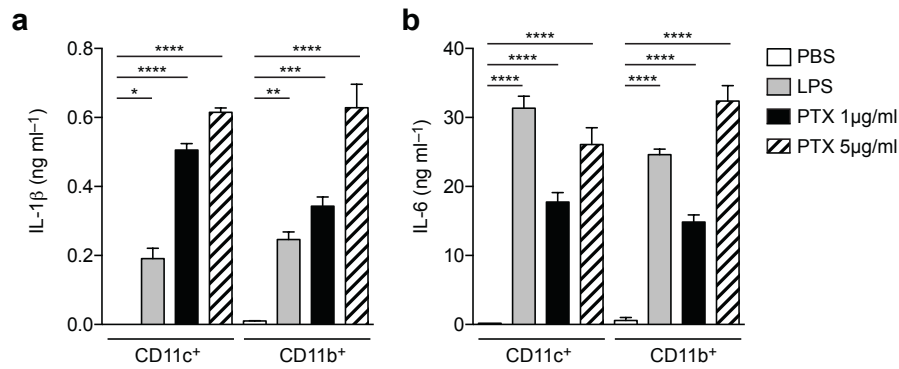

**Supplementary Figure 8: PTX induces production of IL-1 $\beta$  by CD11c<sup>+</sup> and CD11b<sup>+</sup> myeloid cells *in vitro*.** Production of IL-1 $\beta$  (**a**) and IL-6 (**b**) by CD11c<sup>+</sup> and CD11b<sup>+</sup> myeloid cells sorted by MACS from spleen and lymph nodes of wt mice and cultured *in vitro* ( $10^5$  cells/well in 96-well plate) for 16 hrs in the presence of the indicated stimuli. ATP was added for the last 45 min of culture. Data are mean + s.e.m. (n=3) and are representative of two independent experiments. \*,  $P < 0.05$ ; \*\*,  $P < 0.01$ ; \*\*\*,  $P < 0.001$ ; \*\*\*\*,  $P < 0.0001$ , as determined by nonparametric unpaired Mann-Whitney test.

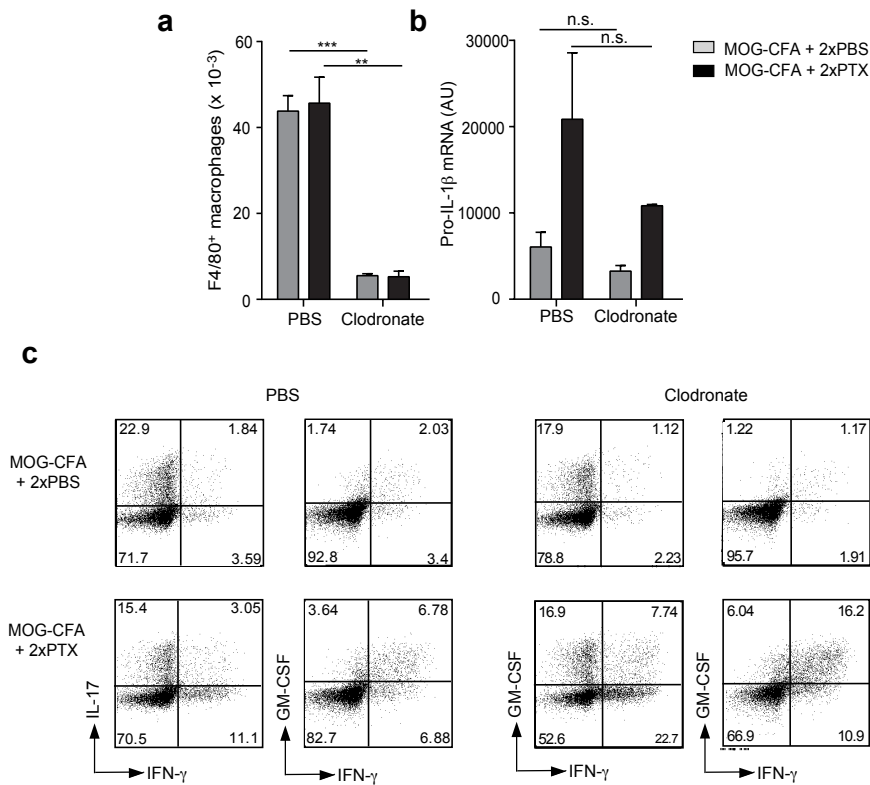

### Supplementary Figure 9: PTX effect in macrophage depleted mice

(a,b) Absolute numbers of CD11b<sup>+</sup> F4/80<sup>+</sup> Gr1<sup>low</sup> cells and pro-IL-1β mRNA abundance 72 hrs after immunization in DLN of mice that had been treated with clodronate-containing liposomes (clodronate) or PBS liposomes (PBS). Data are mean + s.e.m. (n=3) and are representative of two independent experiments. \*\*,  $P < 0.01$ ; \*\*\*,  $P < 0.001$ , as determined by nonparametric unpaired Mann-Whitney test. (c) Representative flow cytometry analysis of intracellular cytokine staining of 2D2 T cells from DLN of immunized clodronate- or PBS-treated mice. Cells were restimulated *in vitro* for 5 hrs with PMA and ionomycin, in the presence of BFA for the last 3 hrs. Numbers indicate percentage positive cells in each quadrant. Data are from pool of six lymph nodes/group from three immunized mice and are representative of two independent experiments.

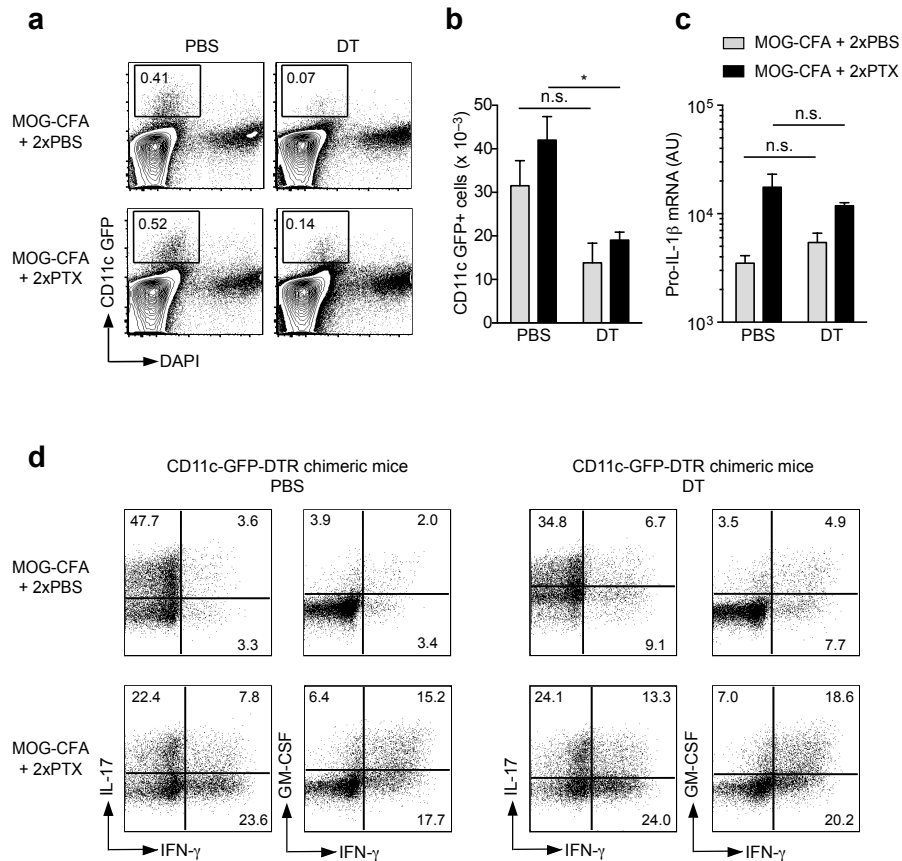

### Supplementary Figure 10: PTX effect in CD11c-GFP-DTR chimeric mice

**(a)** Flow cytometry analysis of CD11c-GFP<sup>+</sup> in CD11c-GFP-DTR chimeric mice after i.p. administration of PBS (left panel) or DT (right panel) and immunization with MOG-CFA and injection of PBS or PTX on day 0 and day 2. **(b,c)** Absolute numbers of CD11c-GFP<sup>+</sup> cells and pro-IL-1 $\beta$  mRNA abundance in DLN of CD11c-GFP-DTR chimeric mice 72 hrs after immunization. Data are mean + s.e.m. (n=3) and are representative of two independent experiments. \*,  $P < 0.05$ , as determined by nonparametric unpaired Mann-Whitney test. **(d)** Representative flow cytometry analysis of intracellular cytokine staining of 2D2 T cells from DLN of immunized CD11c-GFP-DTR chimeric mice. Cells were restimulated *in vitro* for 5 hrs with PMA and ionomycin, in the presence of BFA for the last 3 hrs. Numbers indicate percentage positive cells in each quadrant. Data are from pool of six lymph nodes/group from three immunized mice and are representative of three independent experiments.

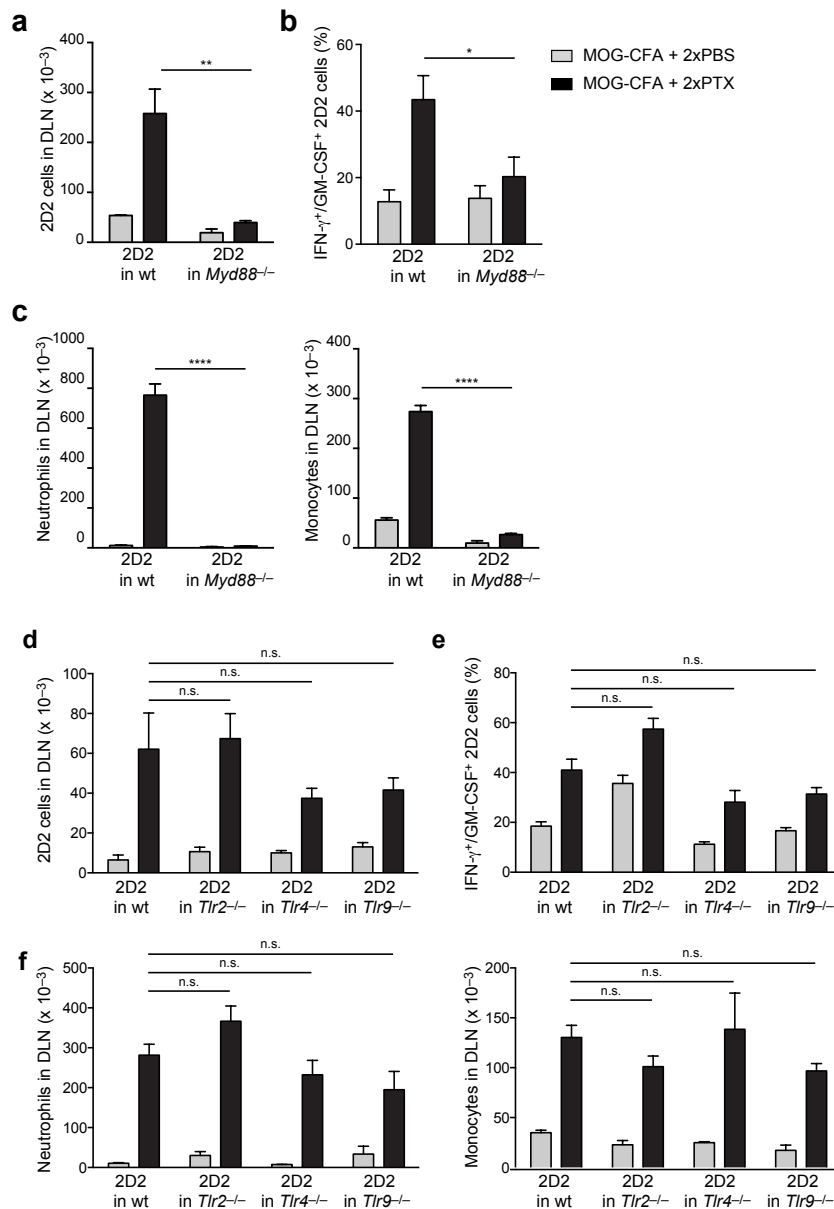

**Supplementary Figure 11: PTX requires MyD88 signalling on non-T cells.**

**(a,b)** Absolute number of CD90.1<sup>+</sup> CD4<sup>+</sup> 2D2 T cells (a) and percentage of IFN- $\gamma$ <sup>+</sup>/GM-CSF<sup>+</sup> 2D2 T cells (b) in DLN of wt or *Myd88*<sup>-/-</sup> hosts immunized 5 days earlier with MOG-CFA and injected with two doses of PBS or PTX on day 0 and day 2. **(d,e)** Absolute number of CD90.1<sup>+</sup> CD4<sup>+</sup> 2D2 T cells (d) and percentage of IFN- $\gamma$ <sup>+</sup>/GM-CSF<sup>+</sup> 2D2 T cells (e) in DLN of wt or *Tlr*<sup>-/-</sup> hosts immunized 5 days earlier with MOG-CFA and injected with two doses of PBS or PTX on day 0 and day 2. **(c,f)** Absolute number of CD11b<sup>+</sup> Gr1<sup>hi</sup> Ly6C<sup>int</sup> Ly6G<sup>+</sup> neutrophils and CD11b<sup>+</sup> Gr1<sup>int</sup> Ly6C<sup>hi</sup> Ly6G<sup>-</sup> monocytes in DLN of wt or *Myd88*<sup>-/-</sup> hosts (c) or wt and *Tlr*<sup>-/-</sup> hosts (f) on day 5 after immunization with MOG-CFA

and injection of 2 doses of PBS or PTX on day 0 and day 2. Data are from pool of six lymph nodes/group from three immunized mice and are representative of five independent experiments. \*,  $P < 0.05$ , \*\*,  $P < 0.01$ ; \*\*\*\*,  $P < 0.0001$ , as determined by nonparametric unpaired Mann-Whitney test.

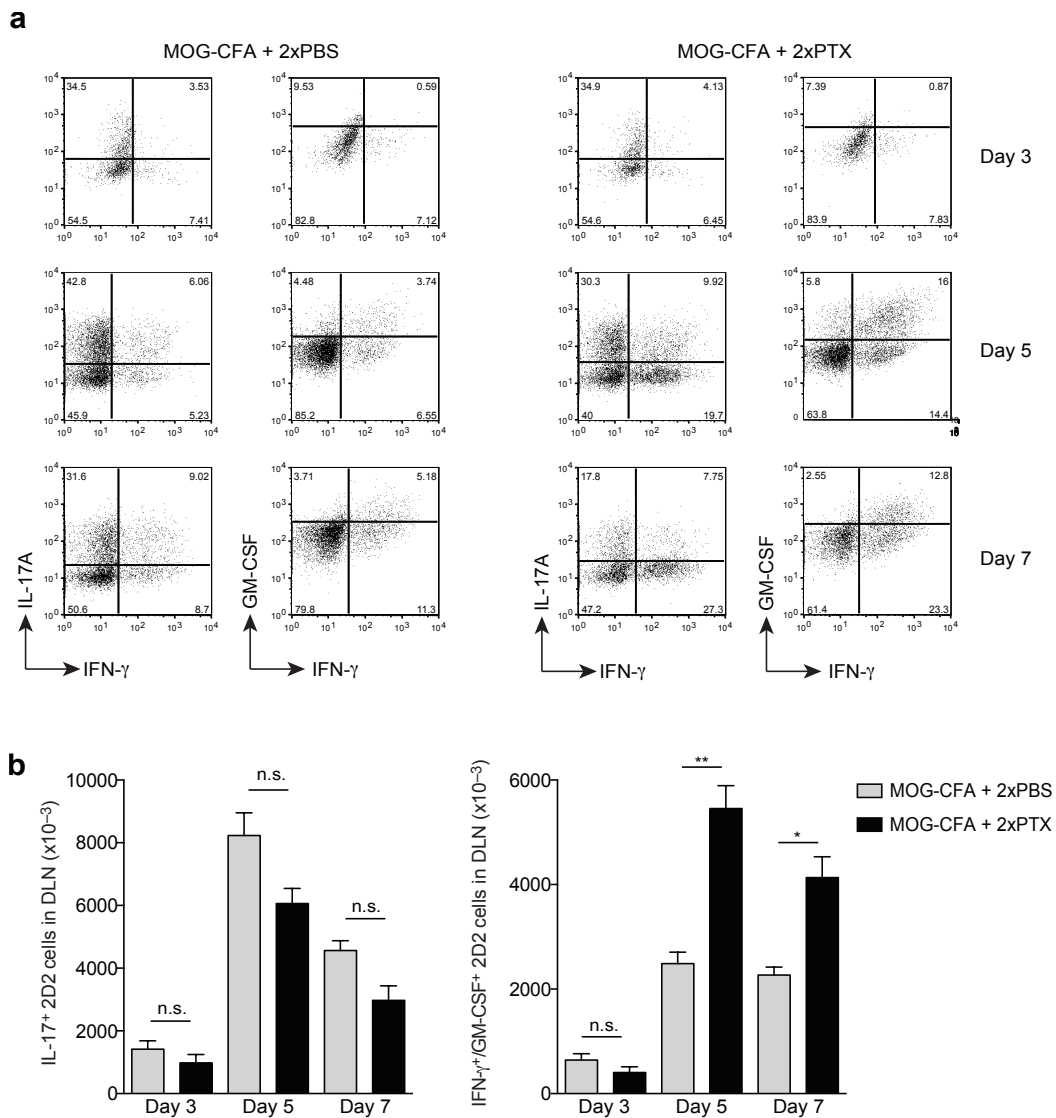

**Supplementary Figure 12: Cytokine production by 2D2 T cells at different time points after immunization.**

**(a)** Representative flow cytometry analysis of CD90.1<sup>+</sup> 2D2 T cells in DLN of mice at different time points after immunization with MOG-CFA and injection of PBS or PTX on day 0 and day 2. Cells were restimulated *in vitro* for 5 hrs with PMA and ionomycin, in the presence of BFA for the last 3 hrs. Numbers indicate percentage positive cells in each quadrant. **(b)** Absolute number of IL-17<sup>+</sup> and IFN- $\gamma$ <sup>+</sup>/GM-CSF<sup>+</sup> CD90.1<sup>+</sup> 2D2 T cells in DLN of mice at different time points after immunization with MOG-CFA and injection of PBS or PTX on day 0 and day 2. Data are mean + s.e.m. (n=3-6) from two independent experiments with at least three mice per group. \*,  $P < 0.05$ , \*\*,  $P < 0.01$ , as determined by nonparametric unpaired Mann-Whitney test.
